# Supplementary material
Source: publisher figshare collection journal article supplement (https://gsapubs.figshare.com/ndownloader/files/22745402)
Supplement: Supplementary file 1 [file 22745402]

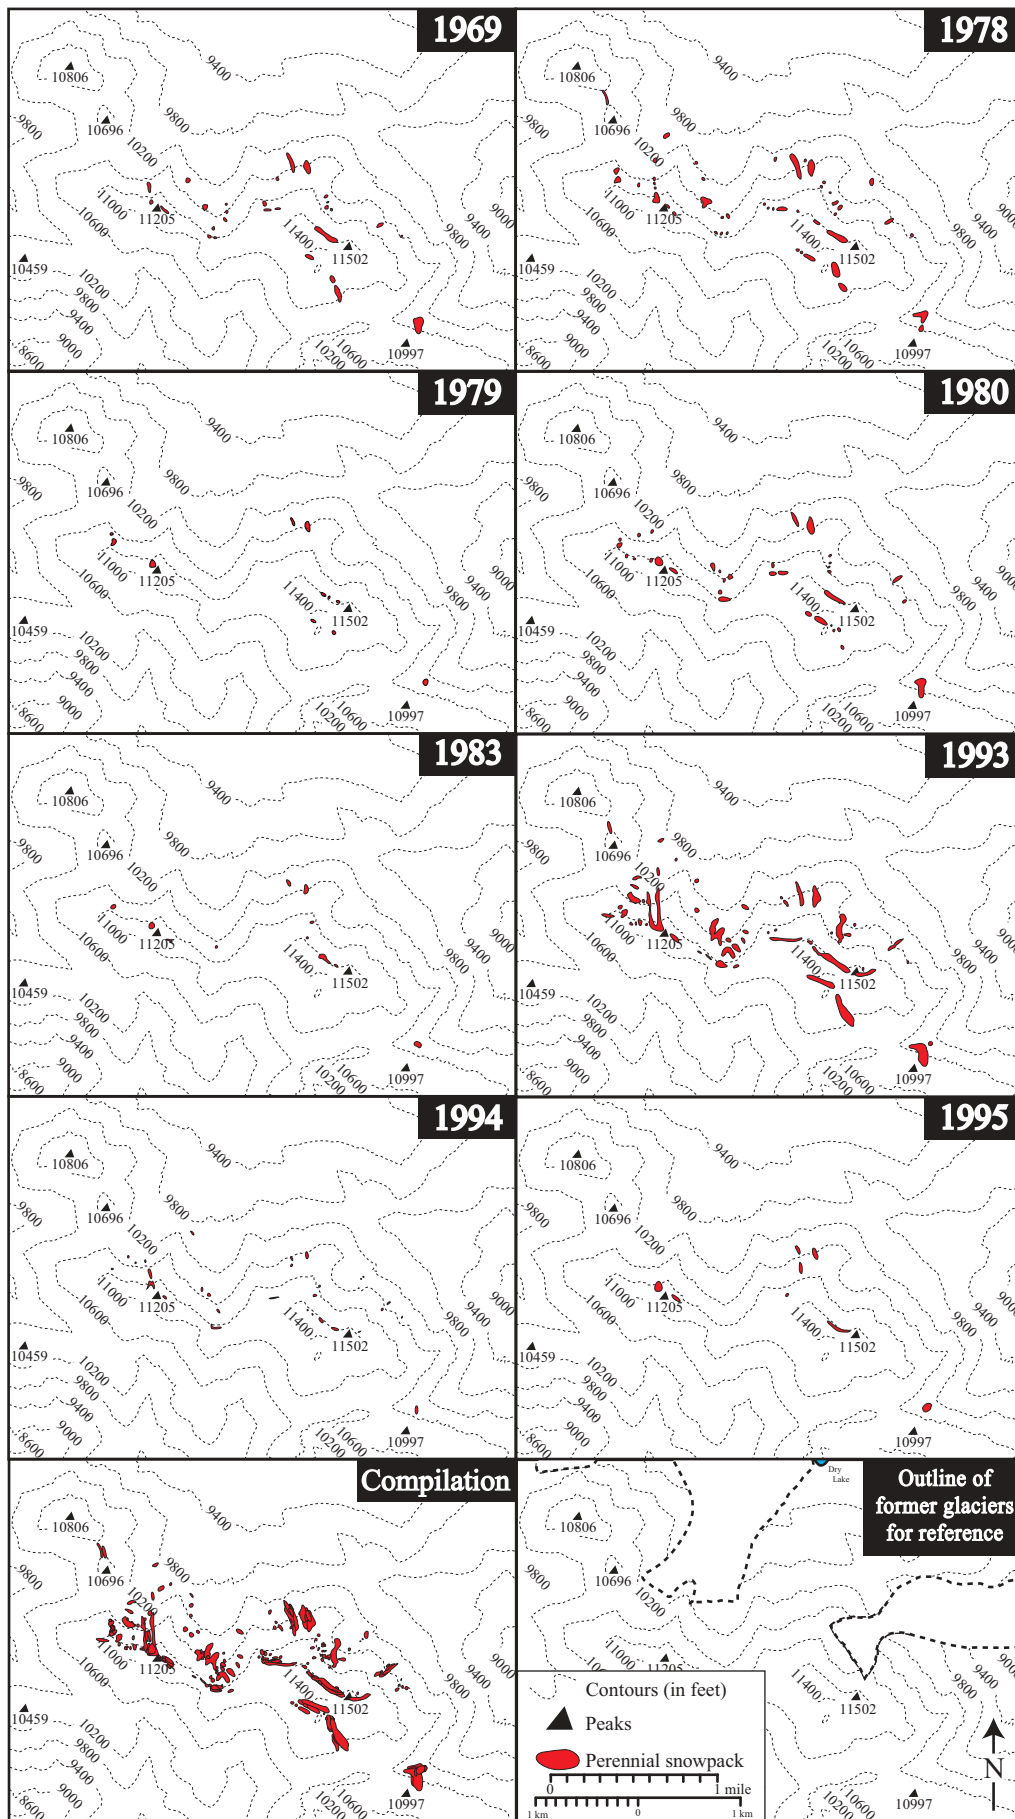

Figure DR1. Perennial snow patches on San Gorgonio Mountain for years during the period between 1969-1995, with compilation showing the main areas where snow persists.

## **Appendix 1: Cosmogenic radionuclide $^{10}\text{Be}$ dating methods and results**

All the rocks sampled were monzogranites and gneisses. We sampled ~500 g of rock from the most horizontal surface on the top of each boulder by chiseling off the outer 1–5 cm. The latitude, longitude, and altitude of each sample were determined using a handheld global positioning unit, and topographic shielding was determined by measuring the skyline from each boulder using an inclinometer and compass. A description of the local setting and the characteristics of each boulder were recorded and photographs were taken.

Of each sample ~500 g was crushed and sieved to separate out the 250–500  $\mu\text{m}$  size fraction for further analysis. Clean quartz was isolated from each sample using HCl and HF:HNO<sub>3</sub> leaching (Kohl and Nishiizumi, 1992) and a Frantz magnetic separator. Beryllium carrier was then added and the quartz was dissolved in HF/HNO<sub>3</sub>. After dissolution the sample was fumed to dryness three times with perchloric acid to remove fluoride. The samples were run through anion and cation exchange resins to collect the Be fraction. Individual samples next were dried and then ignited to produce BeO. The BeO was crushed with Nb powder and then loaded into aluminum cathodes for measurement with the accelerator mass spectrometer (AMS). The AMS measurements for the  $^{10}\text{Be}$  were carried out at the Lawrence Livermore National Laboratory AMS facility (Davis et al., 1990).  $^{10}\text{Be}$  measurements were normalized to an ICN standard prepared by K. Nishiizumi using a half-life of  $1.5 \times 10^6$  yr.

The measured isotope ratios were converted to radionuclide concentrations in quartz using the total beryllium in the samples and the sample weights. Radionuclide concentrations were then converted to zero-erosion exposure ages using a sea-level high latitude (SLHL)  $^{10}\text{Be}$  production rate of 5.2 at/g-quartz/yr. The beryllium production rate used is based on a number of independent measurements of production rate as discussed by Owen et al. (2001; 2002). Production rates were scaled to the latitude and elevation of the San Geronio sampling sites using the star scaling factors of Lal (1991) and an assumed 3% SLHL muon contribution to production rates, and were further corrected for changes in the geomagnetic field over time. Details of the calculation were given in Owen et al. (2001, 2002).

TABLE 1. SAMPLE NUMBERS, LOCATIONS, AND COSMOGENIC RADIONUCLIDE  $^{10}\text{Be}$  DATA AND AGES FOR BOULDERS ON MORAINES ON SAN GORGONIO MOUNTAIN

| Sample number | Latitude ( $\pm 0.01^\circ\text{N}$ ) | Longitude ( $\pm 0.01^\circ\text{W}$ ) | Altitude (m above sea level) | Shielding factor | $^{10}\text{Be}$ ( $10^6/\text{g}$ ) | atoms quartz) | Exposure (years) | age | Geomagnetic correction (years) |     |
|---------------|---------------------------------------|----------------------------------------|------------------------------|------------------|--------------------------------------|---------------|------------------|-----|--------------------------------|-----|
| SG1           | 34°06.996'N                           | 116°49.961'W                           | 2850                         | 0.99             | 1012474                              | $\pm 27091$   | 13369 $\pm$      | 358 | 14254 $\pm$                    | 381 |
| SG2           | 34°07.045'N                           | 116°49.917'W                           | 2825                         | 0.99             | 1120663                              | $\pm 29938$   | 15113 $\pm$      | 404 | 16085 $\pm$                    | 430 |
| SG3           | 34°07.067'N                           | 116°49.879'W                           | 2824                         | 0.99             | 1134244                              | $\pm 38667$   | 15212 $\pm$      | 519 | 16190 $\pm$                    | 552 |
| SG4           | 34°07.077'N                           | 116°49.834'W                           | 2825                         | 0.99             | 1113386                              | $\pm 29041$   | 14923 $\pm$      | 389 | 15888 $\pm$                    | 414 |
| SG5           | 34°07.097'N                           | 116°49.819'W                           | 2816                         | 0.99             | 1174714                              | $\pm 30854$   | 15834 $\pm$      | 416 | 16836 $\pm$                    | 442 |
| SG6           | 34°07.246'N                           | 116°49.815'W                           | 2800                         | 0.99             | 1079593                              | $\pm 28622$   | 14691 $\pm$      | 390 | 15645 $\pm$                    | 415 |
| SG7           | 34°07.251'N                           | 116°49.828'W                           | 2797                         | 0.99             | 503007                               | $\pm 12960$   | 14926 $\pm$      | 385 | 15891 $\pm$                    | 409 |
| SG8           | 34°07.263'N                           | 116°49.854'W                           | 2804                         | 0.99             | 516507                               | $\pm 14172$   | 15263 $\pm$      | 419 | 16241 $\pm$                    | 446 |
| SG9           | 34°07.269'N                           | 116°49.869'W                           | 2798                         | 0.99             | 497380                               | $\pm 13536$   | 14750 $\pm$      | 401 | 15707 $\pm$                    | 428 |
| SG10          | 34°07.274'N                           | 116°49.877'W                           | 2822                         | 0.99             | 480765                               | $\pm 18429$   | 14048 $\pm$      | 539 | 14973 $\pm$                    | 574 |
| SG11          | 34°06.257'N                           | 116°50.333'W                           | 3142                         | 0.99             | 75475                                | $\pm 5212$    | 1820 $\pm$       | 126 | 2027 $\pm$                     | 140 |
| SG12          | 34°06.254'N                           | 116°50.330'W                           | 3145                         | 0.99             | 253542                               | $\pm 11012$   | 6109 $\pm$       | 265 | 6685 $\pm$                     | 290 |
| SG13          | 34°06.251'N                           | 116°50.328'W                           | 3149                         | 0.99             | 135730                               | $\pm 7091$    | 3261 $\pm$       | 170 | 3912 $\pm$                     | 204 |
| SG14          | 34°06.259'N                           | 116°50.324'W                           | 3142                         | 0.99             | 236411                               | $\pm 7585$    | 5706 $\pm$       | 183 | 6314 $\pm$                     | 203 |
| SG15          | 34°06.501'N                           | 116°50.291'W                           | 3037                         | 0.99             | 503736                               | $\pm 13151$   | 12944 $\pm$      | 338 | 13805 $\pm$                    | 360 |
| SG16          | 34°06.536'N                           | 116°50.269'W                           | 3018                         | 0.99             | 451488                               | $\pm 11886$   | 11730 $\pm$      | 309 | 12486 $\pm$                    | 329 |
| SG17          | 34°06.547'N                           | 116°50.262'W                           | 3016                         | 0.99             | 476375                               | $\pm 12673$   | 12392 $\pm$      | 330 | 13207 $\pm$                    | 351 |
| SG18          | 34°06.555'N                           | 116°50.262'W                           | 3011                         | 0.99             | 493580                               | $\pm 13488$   | 12880 $\pm$      | 352 | 13734 $\pm$                    | 375 |
| SG19          | 34°06.544'N                           | 116°50.269'W                           | 3019                         | 0.99             | 324403                               | $\pm 9465$    | 8416 $\pm$       | 246 | 8960 $\pm$                     | 261 |
| SG20          | 34°07.291'N                           | 116°51.474'W                           | 2932                         | 0.99             | 684650                               | $\pm 17155$   | 18742 $\pm$      | 470 | 19860 $\pm$                    | 498 |
| SG21          | 34°07.404'N                           | 116°51.307'W                           | 2886                         | 0.99             | 440836                               | $\pm 11728$   | 12387 $\pm$      | 330 | 13196 $\pm$                    | 351 |
| SG22          | 34°07.423'N                           | 116°51.193'W                           | 2848                         | 0.99             | 501659                               | $\pm 13043$   | 14430 $\pm$      | 375 | 15375 $\pm$                    | 400 |
| SG23          | 34°07.392'N                           | 116°51.128'W                           | 2964                         | 0.99             | 480477                               | $\pm 12583$   | 12886 $\pm$      | 338 | 13740 $\pm$                    | 360 |
| SG24          | 34°07.386'N                           | 116°51.109'W                           | 2847                         | 0.99             | 475828                               | $\pm 11941$   | 13693 $\pm$      | 344 | 14602 $\pm$                    | 366 |
| SG25          | 34°07.532'N                           | 116°50.998'W                           | 2764                         | 0.99             | 619049                               | $\pm 15446$   | 18751 $\pm$      | 468 | 19861 $\pm$                    | 496 |
| SG26          | 34°07.530'N                           | 116°50.983'W                           | 2761                         | 0.99             | 647705                               | $\pm 15939$   | 19659 $\pm$      | 484 | 20800 $\pm$                    | 512 |
| SG27          | 34°07.547'N                           | 116°50.987'W                           | 2758                         | 0.99             | 617677                               | $\pm 15429$   | 18779 $\pm$      | 469 | 19890 $\pm$                    | 497 |
| SG28          | 34°07.536'N                           | 116°50.970'W                           | 2750                         | 0.99             | 1019704                              | $\pm 24378$   | 31244 $\pm$      | 747 | 32174 $\pm$                    | 769 |
| SG29          | 34°06.289'N                           | 116°49.387'W                           | 3157                         | 0.99             | 408038                               | $\pm 10834$   | 9772 $\pm$       | 260 | 10343 $\pm$                    | 275 |
| SG30          | 34°06.291'N                           | 116°49.388'W                           | 3160                         | 0.99             | 499585                               | $\pm 14190$   | 11950 $\pm$      | 339 | 12731 $\pm$                    | 362 |
| SG31          | 34°06.307'N                           | 116°49.421'W                           | 3167                         | 0.99             | 496404                               | $\pm 12813$   | 11819 $\pm$      | 305 | 12590 $\pm$                    | 325 |
| SG32          | 34°06.307'N                           | 116°49.419'W                           | 3166                         | 0.99             | 439130                               | $\pm 11580$   | 10458 $\pm$      | 276 | 11098 $\pm$                    | 293 |
| SG33          | 34°06.299'N                           | 116°49.156'W                           | 3081                         | 0.99             | 602483                               | $\pm 17755$   | 15102 $\pm$      | 445 | 16086 $\pm$                    | 474 |
| SG34          | 34°06.291'N                           | 116°49.166'W                           | 3076                         | 0.99             | 890216                               | $\pm 21729$   | 22417 $\pm$      | 547 | 23598 $\pm$                    | 576 |
| SG35          | 34°06.321'N                           | 116°49.159'W                           | 3077                         | 0.99             | 580793                               | $\pm 14755$   | 14582 $\pm$      | 371 | 15545 $\pm$                    | 395 |
| SG36          | 34°06.323'N                           | 116°49.157'W                           | 3079                         | 0.99             | 582355                               | $\pm 21375$   | 14605 $\pm$      | 536 | 15568 $\pm$                    | 571 |

|       |             |              |      |      |                |             |             |
|-------|-------------|--------------|------|------|----------------|-------------|-------------|
| SG37  | 34°06.355'N | 116°48.723'W | 2913 | 0.99 | 644138 ± 16149 | 17840 ± 447 | 18922 ± 474 |
| SG38  | 34°06.355'N | 116°48.736'W | 2916 | 0.99 | 503209 ± 13011 | 13899 ± 359 | 14822 ± 383 |
| SG39  | 34°06.394'N | 116°48.688'W | 2915 | 0.99 | 679130 ± 16894 | 18791 ± 467 | 19909 ± 495 |
| SG40A | 34°06.415'N | 116°48.703'W | 2923 | 0.99 | 574972 ± 14621 | 15822 ± 402 | 16828 ± 428 |
| SG40B | 34°06.415'N | 116°48.703'W | 2923 | 0.99 | 547307 ± 13942 | 15058 ± 384 | 16033 ± 408 |
| SG41  | 34°06.462'N | 116°50.824'W | 3123 | 0.99 | 398245 ± 13581 | 10129 ± 345 | 10734 ± 366 |
| SG42  | 34°06.462'N | 116°50.829'W | 3126 | 0.99 | 335301 ± 11213 | 8723 ± 292  | 9289 ± 311  |
| SG43  | 34°06.455'N | 116°50.816'W | 3128 | 0.99 | 313451 ± 11278 | 7976 ± 287  | 8484 ± 305  |
| SG44  | 34°06.465'N | 116°50.832'W | 3121 | 0.99 | 292923 ± 10497 | 7450 ± 267  | 7920 ± 284  |
| SG45  | 34°06.508'N | 116°50.815'W | 3098 | 0.99 | 445983 ± 14354 | 11581 ± 373 | 12327 ± 397 |
| SG46  | 34°06.505'N | 116°50.817'W | 3093 | 0.99 | 358531 ± 12160 | 9206 ± 312  | 9744 ± 331  |
| SG47  | 34°06.508'N | 116°50.822'W | 3093 | 0.99 | 180856 ± 10522 | 4714 ± 274  | 5400 ± 314  |
| SG48  | 34°06.582'N | 116°50.714'W | 3048 | 0.99 | 494655 ± 28256 | 13056 ± 746 | 13926 ± 796 |
| SG49  | 34°06.575'N | 116°50.707'W | 3049 | 0.99 | 440894 ± 13387 | 11604 ± 352 | 12350 ± 375 |
| SG50  | 34°06.577'N | 116°50.688'W | 3045 | 0.99 | 470939 ± 14409 | 12402 ± 380 | 13218 ± 404 |

---

## **ADDITIONAL REFERENCES CITED**

Davis, J.C., Proctor, I.D., Southon, J.R., Caffee, M.W., Heikkinen, D.W., Roberts, M.L., Turteltaub, K.W., Nelson, D.E., Loyd, D.H. and Vogel, J.S., 1990, LLNL/UC AMS facility and research program: Nuclear Instruments and Methods in Physics Research, v. B52, p. 269–272.

Kohl, C.P., and Nishiizumi, K., 1992, Chemical isolation of quartz for measurement of in-situ-produced cosmogenic nuclides: *Geochimica et Cosmochimica Acta*, v. 56, p.3583–3587.

Lal, D., 1991, Cosmic ray labeling of erosion surfaces: In situ nuclide production rates and erosion models: *Earth and Planetary Science Letters*, v. 104, p. 429–439.

Owen, L.A., Gualtieri, L., Finkel, R.C., Caffee, M.W., Benn, D.I., and Sharma, M.C., 2001, Cosmogenic radionuclide dating of glacial landforms in the Lahul Himalaya, Northern India: Defining the timing of late Quaternary glaciation: *Journal of Quaternary Science*, v. 16, p. 555–563.

Owen, L.A., Finkel, R.C., Caffee, M.W., and Gualtieri, L., 2002, Timing of multiple glaciations during the late Quaternary in the Hunza Valley, Karakoram Mountains, northern Pakistan: Defined by cosmogenic radionuclide dating of moraines: *Geological Society of America Bulletin*, v. 114, p. 593–604.



## **Appendix 2: Equilibrium-line altitude reconstructions**

Equilibrium-line altitudes (ELAs) were calculated using the maximum altitude of preserved lateral moraines within each glacial stage. Both the accumulation area ratio (AAR) and the toe-to-headwall altitude ratio (THAR) methods of Furbish and Andrews (1984) and Meierding (1982) were used. We applied an AAR of 5.0–8.0 that is typical of mountain glaciers (Benn and Gemmell, 1997) and a THAR of 0.7 as used by Clark et al (1994) in the Sierra Nevada for debris-covered glaciers. This range of values helps take into account the influence of thick debris cover on these glaciers that may significantly reduce the size of the ablation zone.

Minnich (1984, 1986) showed that at 3200 m above sea level (asl) (700 mbar) the contemporary mean July temperature and precipitation on San Gorgonio Mountain is  $\sim 10$  °C and 700-1000 mm yr<sup>-1</sup>. The relation between precipitation and temperature at glacier ELAs derived by Ohmura et al. (1992) indicates that the temperature at a hypothetical contemporary San Gorgonio ELA should be between 0.5 and 1 °C. The average global environmental lapse rate of 6 °C km<sup>-1</sup> implies that this temperature will occur at an altitude of 4700–4780 m asl in the San Gorgonio Mountains. During summer in California, however, environmental lapse rates are close to the dry adiabatic rate of 10 °C km<sup>-1</sup> due to the existence of a strong sensible heat flux and the absence of latent fluxes. This lapse rate suggests that a hypothetical contemporary ELA would be at an altitude of between 4100 to 4150 m asl. Burbank (1991) showed that the ELAs for contemporary glaciers in the Sierra Nevada increased to the SSE by  $\sim 2.0$  m km<sup>-1</sup>, ranging from  $\sim 3500$  m asl at Ritter Range (37.7°N) to  $\sim 3800$  m asl on Olancha Peak (36.3°N). If this gradient



is regionally consistent, the hypothetical contemporary ELA on San Gorgonio, ~270 km SSW of Olancho Peak, should be ~4340 m asl. Thus the ELA for a hypothetical contemporary glacier on San Gorgonio Mountain is in the range of 4100–4780 m asl.

On the basis of packrat midden data, Van Devender (1990) and Spaulding (1990) suggested that during the LGM, precipitation in the Sonoran and Mojave Deserts was 50% and <40% higher than today. The high-pressure system produced by the Laurentide ice sheet steered the mid-latitude jet stream to the south, leading to an increased vapor flux on San Gorgonio Mountain. It is likely that precipitation there during glacial times was at least 50% higher than today and hence was probably between 1000 and 2000  $\text{mm yr}^{-1}$ . The precipitation-temperature relationships of Ohmura et al. (1992) suggest that the temperature at the ELA during glacial times was probably between 1 and 4 °C as the result of this increase in precipitation. We therefore used the reconstructed ELAs to calculate a range of ELA depressions and mean July temperature differences based on environmental lapse rates ranging between 6 and 10 °C/km and the reconstructed ELAs for each glacial advance: 1200–1980 m (8.3–13.8 °C), 955–1925 m (6.6–13.3 °C), 900–1710 m (6.0–11.1 °C) and 950–1660 m (6.5–10.6 °C) for stages I, II, III and V, respectively.

## **REFERENCES CITED**

Benn, D.I., and Gemmell, A.M.D., 1997, Calculating equilibrium-line altitudes of former glaciers by the balance ratio method: A new computer spreadsheet: *Glacial Geology and Geomorphology*: <http://ggg.qub.ac.uk/ggg/papers/full/1997/tn011997/tn01.html>.

Burbank, D.W., 1991, Late Quaternary snowline reconstructions for the southern and central Sierra Nevada, California and a reassessment of the “Recess Peak Glaciation”: *Quaternary Research*, v. 36, p. 294–306.

Clark, D.H., Clark, M.M., and Gillespie, A.R., 1994, Debris-covered glaciers in the Sierra Nevada, California, and their implications for snowline reconstructions: *Quaternary Research*, v. 41, p. 139–153.

Furbish, D.J., and Andrews, J.T., 1984, The use of hypsometry to indicate long-term stability and response of valley glaciers to changes in mass transfer: *Journal of Glaciology*, v. 30, p. 199–211.

Meierding, T.C., 1982, Late Pleistocene glacial equilibrium-line in the Colorado Front Range: A comparison of methods: *Quaternary Research*, v. 18, p. 289–310.

Minnich, R.A., 1984, Snow drifting and timberline dynamics on Mount San Geronio, California, USA: *Arctic and Alpine Research*, v. 16, p. 395-412.

Minnich, R. A., 1986, Snow levels and amounts in the mountains of southern California: *Journal of Hydrology*, v. 86, p. 37-58.

Ohmura, A., Kasser, P., and Funk, M., 1992, Climate at the equilibrium line of glaciers: *Journal of Glaciology*, v. 15, p. 403–415.

Spaulding, W.G., 1990, Vegetational and climatic development of the Mojave Desert: the last Glacial Maximum to the Present, *in* Betancourt, J.L., et al., eds., *Packrat middens: The last 40,000 years of biotic change*: Tucson, University of Arizona Press, p. 166–199.

Van Devender, T.R., 1990, Late Quaternary vegetation and climate of the Chihuahuan Desert, United States and Mexico, *in* Betancourt, J.L., et al., eds., *Packrat Middens: The last 40,000 years of biotic change*: Tucson, University of Arizona Press, p. 134–165.

TABLE 2. ELA CALCULATIONS USING THE HEIGHT OF THE HIGHEST LATERAL MORAINE, AN ACCUMULATION AREA RATIO OF 0.5 AND 0.8 (IN BOLD) A TOE-TO-HEAD ALTITUDE RATIO OF 0.7 (IN ITALICS\*) AND ESTIMATES OF LOWERING OF MEAN JULY TEMPERATURES DURING EACH GLACIAL ADVANCE

| Stage | Dollar lake (m)                             | Dry lake (m)                                            | North Fork (m)                                             | ê ELA (m) using a lapse rate of 6° C/km | ê ELA (m) using a lapse rate of 10° C/km | ê Mean July temperature (°C) using a lapse rate of 6° C/km | ê Mean July temperature (°C) using a lapse rate of 10° C/km | Range of ê Mean July temperature (°C) |
|-------|---------------------------------------------|---------------------------------------------------------|------------------------------------------------------------|-----------------------------------------|------------------------------------------|------------------------------------------------------------|-------------------------------------------------------------|---------------------------------------|
| I     | 2900<br><b>2720–2800</b><br><i>&gt;2750</i> | ----                                                    | 2850<br><b>2795–2900</b><br><i>&gt;2920</i>                | 1980–1880                               | 1200–1430                                | 8.3–11.4                                                   | 9.0–13.8                                                    | 8.3–13.8                              |
| II    | 2970<br><b>2810–2835</b><br><i>&gt;2860</i> | 2970<br><b>2775–2900</b><br><i>&gt;2790</i>             | 3145<br><b>2890–2950</b><br><i>&gt;2980</i>                | 1925–1635                               | 955–1375                                 | 6.8–11.1                                                   | 6.6–13.3                                                    | 6.6–13.3                              |
| III   | 3140                                        | 3000<br><b>2990–3055</b><br><i>&gt;2990</i>             | 3170<br><b>3140–3200</b><br><i>&gt;3240</i>                | 1710–1580                               | 900–1160                                 | 6.5–9.8                                                    | 6.0–11.1                                                    | 6.0–11.1                              |
| IV    | ----                                        | Big Draw<br>3150<br><b>3040–3140</b><br><i>&gt;3020</i> | Little Draw<br>3130<br><b>3030–3080</b><br><i>&gt;3030</i> | ----                                    | 1660–1630                                | 950–1110                                                   | 6.8–9.5                                                     | 6.5–10.6                              |

Notes: \* Minimum values of THAR (Meierding, 1982) are quoted because of the uncertainty of defining the highest glacial limits
